# Supplementary material for: A partially reduced C60-grafted macroporous carbon composite for the enhanced electrocatalysis of nitroaromatic compounds
Source: Royal Society of Chemistry journal article supplement (doi:10.1039/c3ra42449a), 2013-01-01
Supplement: c3ra42449a.pdf [file c3ra42449a.pdf]

## Supporting Information

### A partially reduced C<sub>60</sub>-grafted macroporous carbon composite for enhanced of nitroaromatic compounds electrocatalysis

**Table S1** Comparison of the charge-transfer resistance and response to K<sub>3</sub>Fe(CN)<sub>6</sub>/K<sub>2</sub>Fe(CN)<sub>6</sub> with different electrodes

| Electrode                               | $R_{ct}$ ( $\Omega$ ) | $I_p$ ( $\mu$ A) | $\Delta E_p$ (mV) |
|-----------------------------------------|-----------------------|------------------|-------------------|
| bare GCE                                | 656.8                 | 26.5             | 128.5             |
| C <sub>60</sub> /GCE                    | 7162.5                | 9.6              | 469.2             |
| MPC/GCE                                 | 16.5                  | 39.1             | 117.7             |
| MPC-CVs/GCE                             | 16.9                  | 39.1             | 117.9             |
| C <sub>60</sub> /MPC/GCE                | 7.8                   | 53.2             | 89.2              |
| K <sub>3</sub> C <sub>60</sub> /MPC/GCE | 5.2                   | 57.8             | 85.3              |

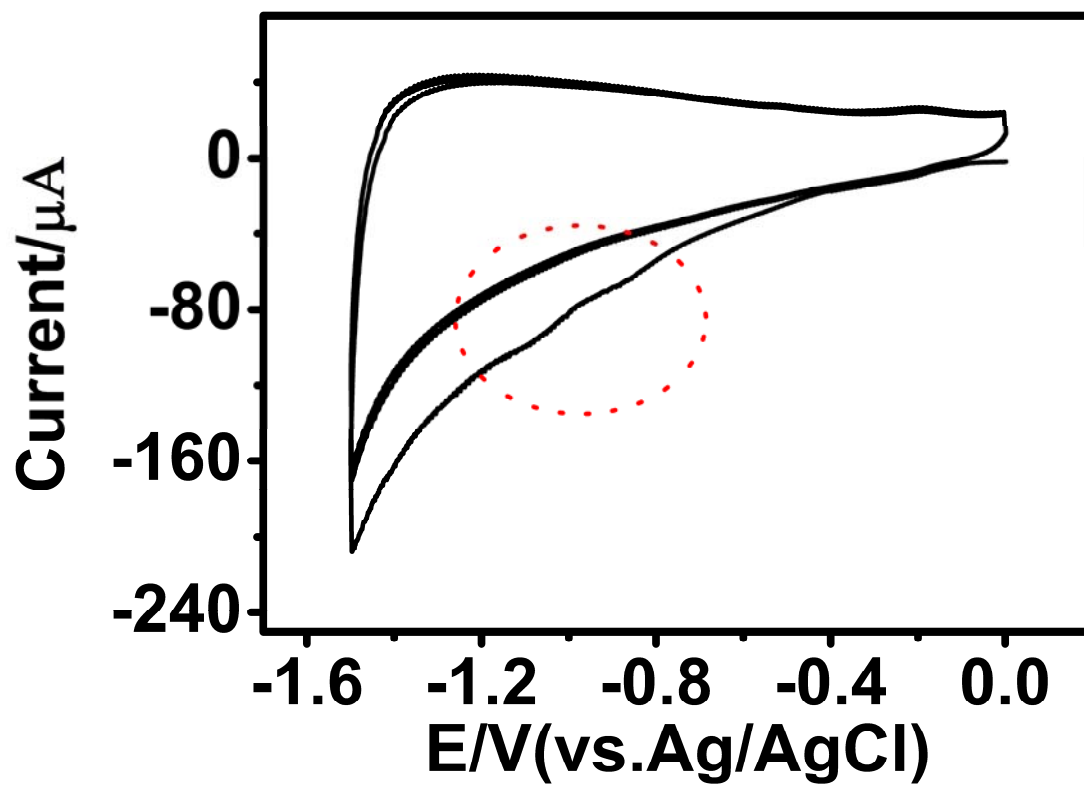

**Fig. S1** CVs for  $C_{60}/MPC/GCE$  with three scan cycles. Electrolyte,  $0.1 \text{ mol L}^{-1}$  pH 7.0

PBS. Scan rate,  $10 \text{ mV s}^{-1}$ .

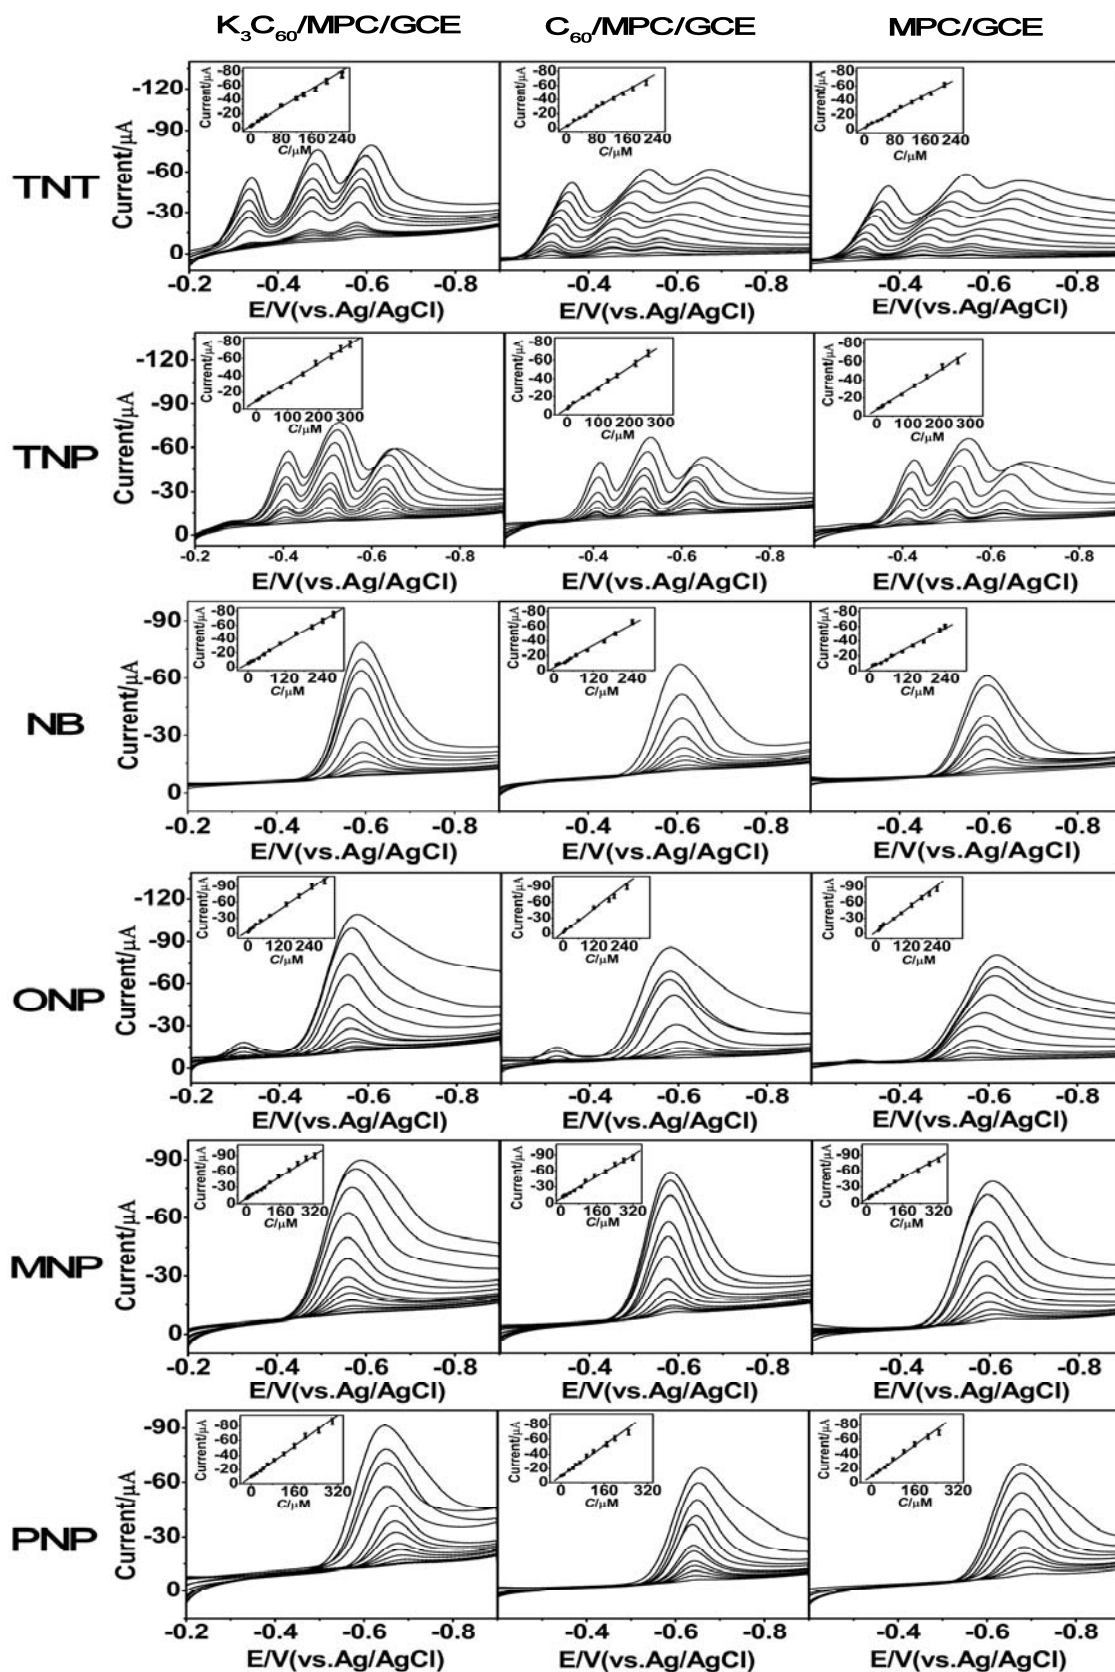

**Fig. S2** Current responses for NACs at the MPC/GCE,  $C_{60}/MPC/GCE$ , and  $K_3C_{60}/MPC/GCE$ . (The second peaks of TNT and TNP were selected to study the linear range.)

**Table S2** Electrochemical parameters for NACs were obtained at the MPC/GCE, C<sub>60</sub>/MPC/GCE, and K<sub>3</sub>C<sub>60</sub>/MPC/GCE

| (NACs) | Electrode                               | Linear range<br>( $\mu\text{M}$ ) | Sensitivity<br>( $\mu\text{A } \mu\text{M}^{-1}$ ) | Detection limit<br>( $\mu\text{M}$ ) |
|--------|-----------------------------------------|-----------------------------------|----------------------------------------------------|--------------------------------------|
| (TNT)  | MPC/GCE                                 | 3-210                             | 0.274                                              | 1.21                                 |
| (TNT)  | C <sub>60</sub> /MPC/GCE                | 3-210                             | 0.293                                              | 1.02                                 |
| (TNT)  | K <sub>3</sub> C <sub>60</sub> /MPC/GCE | 0.5-240                           | 0.303                                              | 0.17                                 |
| (TNP)  | MPC/GCE                                 | 5-260                             | 0.216                                              | 2.05                                 |
| (TNP)  | C <sub>60</sub> /MPC/GCE                | 1-260                             | 0.228                                              | 0.42                                 |
| (TNP)  | K <sub>3</sub> C <sub>60</sub> /MPC/GCE | 1-300                             | 0.230                                              | 0.40                                 |
| (NB)   | MPC/GCE                                 | 1-140                             | 0.263                                              | 0.36                                 |
| (NB)   | C <sub>60</sub> /MPC/GCE                | 0.5-140                           | 0.302                                              | 0.18                                 |
| (NB)   | K <sub>3</sub> C <sub>60</sub> /MPC/GCE | 0.5-160                           | 0.345                                              | 0.17                                 |
| (ONP)  | MPC/GCE                                 | 5-240                             | 0.331                                              | 2.89                                 |
| (ONP)  | C <sub>60</sub> /MPC/GCE                | 1-250                             | 0.342                                              | 0.45                                 |
| (ONP)  | K <sub>3</sub> C <sub>60</sub> /MPC/GCE | 0.5-300                           | 0.360                                              | 0.18                                 |
| (MNP)  | MPC/GCE                                 | 1-320                             | 0.234                                              | 0.56                                 |
| (MNP)  | C <sub>60</sub> /MPC/GCE                | 1-320                             | 0.248                                              | 0.32                                 |
| (MNP)  | K <sub>3</sub> C <sub>60</sub> /MPC/GCE | 1-320                             | 0.284                                              | 0.32                                 |
| (PNP)  | MPC/GCE                                 | 5-250                             | 0.251                                              | 2.11                                 |
| (PNP)  | C <sub>60</sub> /MPC/GCE                | 0.5-250                           | 0.260                                              | 0.22                                 |
| (PNP)  | K <sub>3</sub> C <sub>60</sub> /MPC/GCE | 0.5-300                           | 0.282                                              | 0.15                                 |

**Table S3** Determination of NACs in real samples by standard addition method at  $K_3C_{60}/MPC/GCE$  ( $n = 5$ ).

| Samples | Added ( $\mu M$ ) | Average found ( $\mu M$ ) | Recovery (%) |
|---------|-------------------|---------------------------|--------------|
| TNT     | 10                | 9.52                      | 95.2         |
| TNT     | 50                | 48.61                     | 97.2         |
| TNT     | 100               | 98.60                     | 98.6         |
| TNP     | 10                | 9.67                      | 96.7         |
| TNP     | 50                | 51.22                     | 102.4        |
| TNP     | 100               | 97.93                     | 97.9         |
| NB      | 10                | 9.42                      | 94.2         |
| NB      | 50                | 48.21                     | 96.4         |
| NB      | 100               | 101.19                    | 101.2        |
| ONP     | 10                | 10.02                     | 100.2        |
| ONP     | 50                | 48.66                     | 97.3         |
| ONP     | 100               | 98.5                      | 98.5         |
| MNP     | 10                | 9.51                      | 95.1         |
| MNP     | 50                | 48.31                     | 96.6         |
| MNP     | 100               | 95.2                      | 95.2         |
| PNP     | 10                | 9.88                      | 98.8         |
| PNP     | 50                | 48.96                     | 97.9         |
| PNP     | 100               | 96.6                      | 96.6         |
